# Supplementary material for: Microtubule Dynamics Deregulation Induces Apoptosis in Human Urothelial Bladder Cancer Cells via a p53-Independent Pathway
Source: Cancers (Basel). 2023 Jul 22;15(14):3730. doi: 10.3390/cancers15143730 (PMC10378115; doi:10.3390/cancers15143730)
Supplement: Supplementary file 1 [file cancers-15-03730-s001.zip]

Archive with 7 entries (7 files):
- Drosos et al Supplementary Images.pdf
- Drosos et al Supplementary Tables.xlsx
- Figure_S1.TIF
- Figure_S2.TIF
- Figure_S3.TIF
- Figure_S4.TIF
- File S1.pdf
