# Supplementary figures and images for: Microtubule Dynamics Deregulation Induces Apoptosis in Human Urothelial Bladder Cancer Cells via a p53-Independent Pathway
Source: MDPI journal article supplement (doi:10.3390/cancers15143730), 2023-07-22

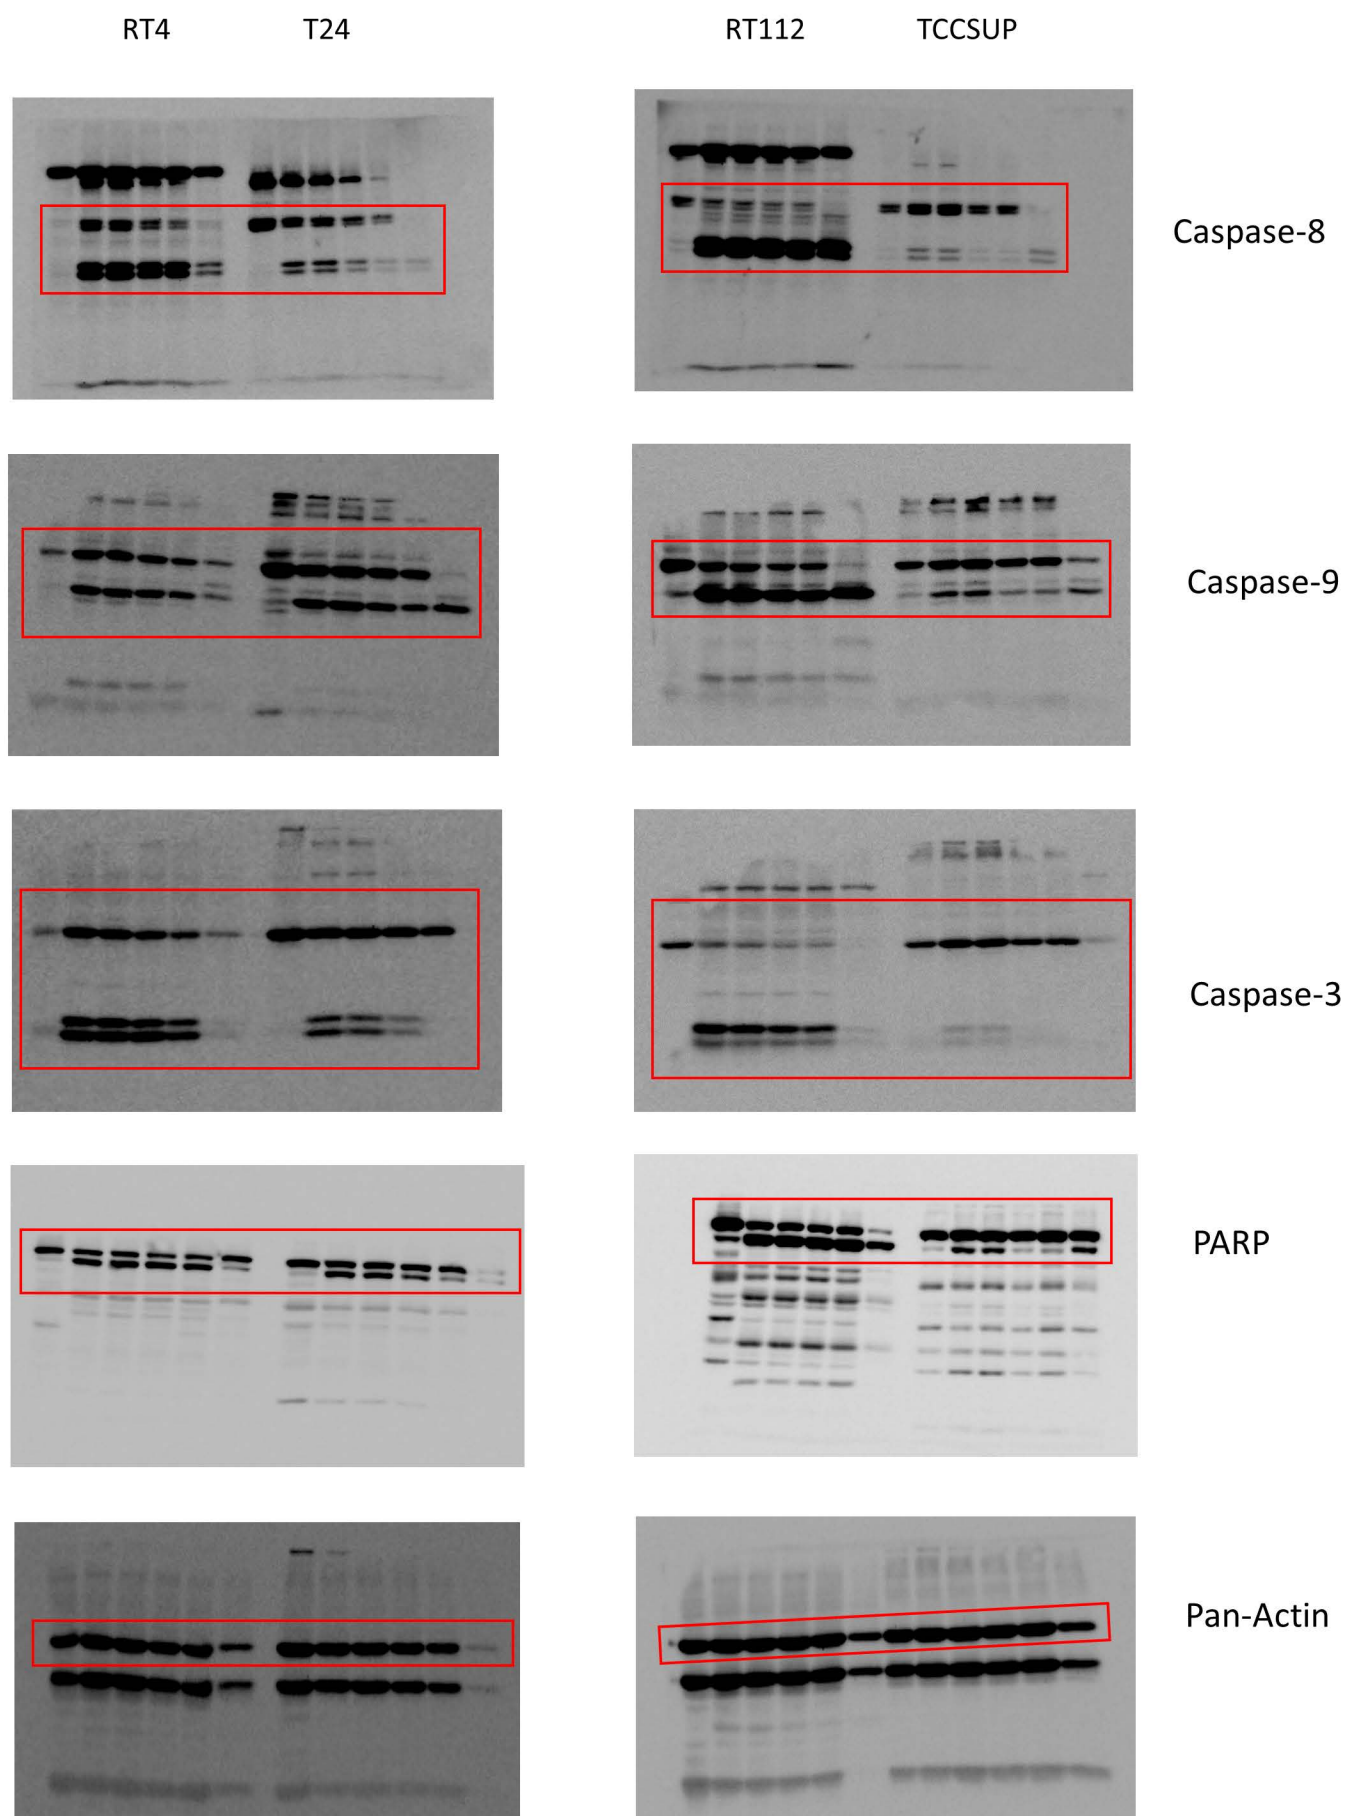

Figure 4A - original images of the Western Blots

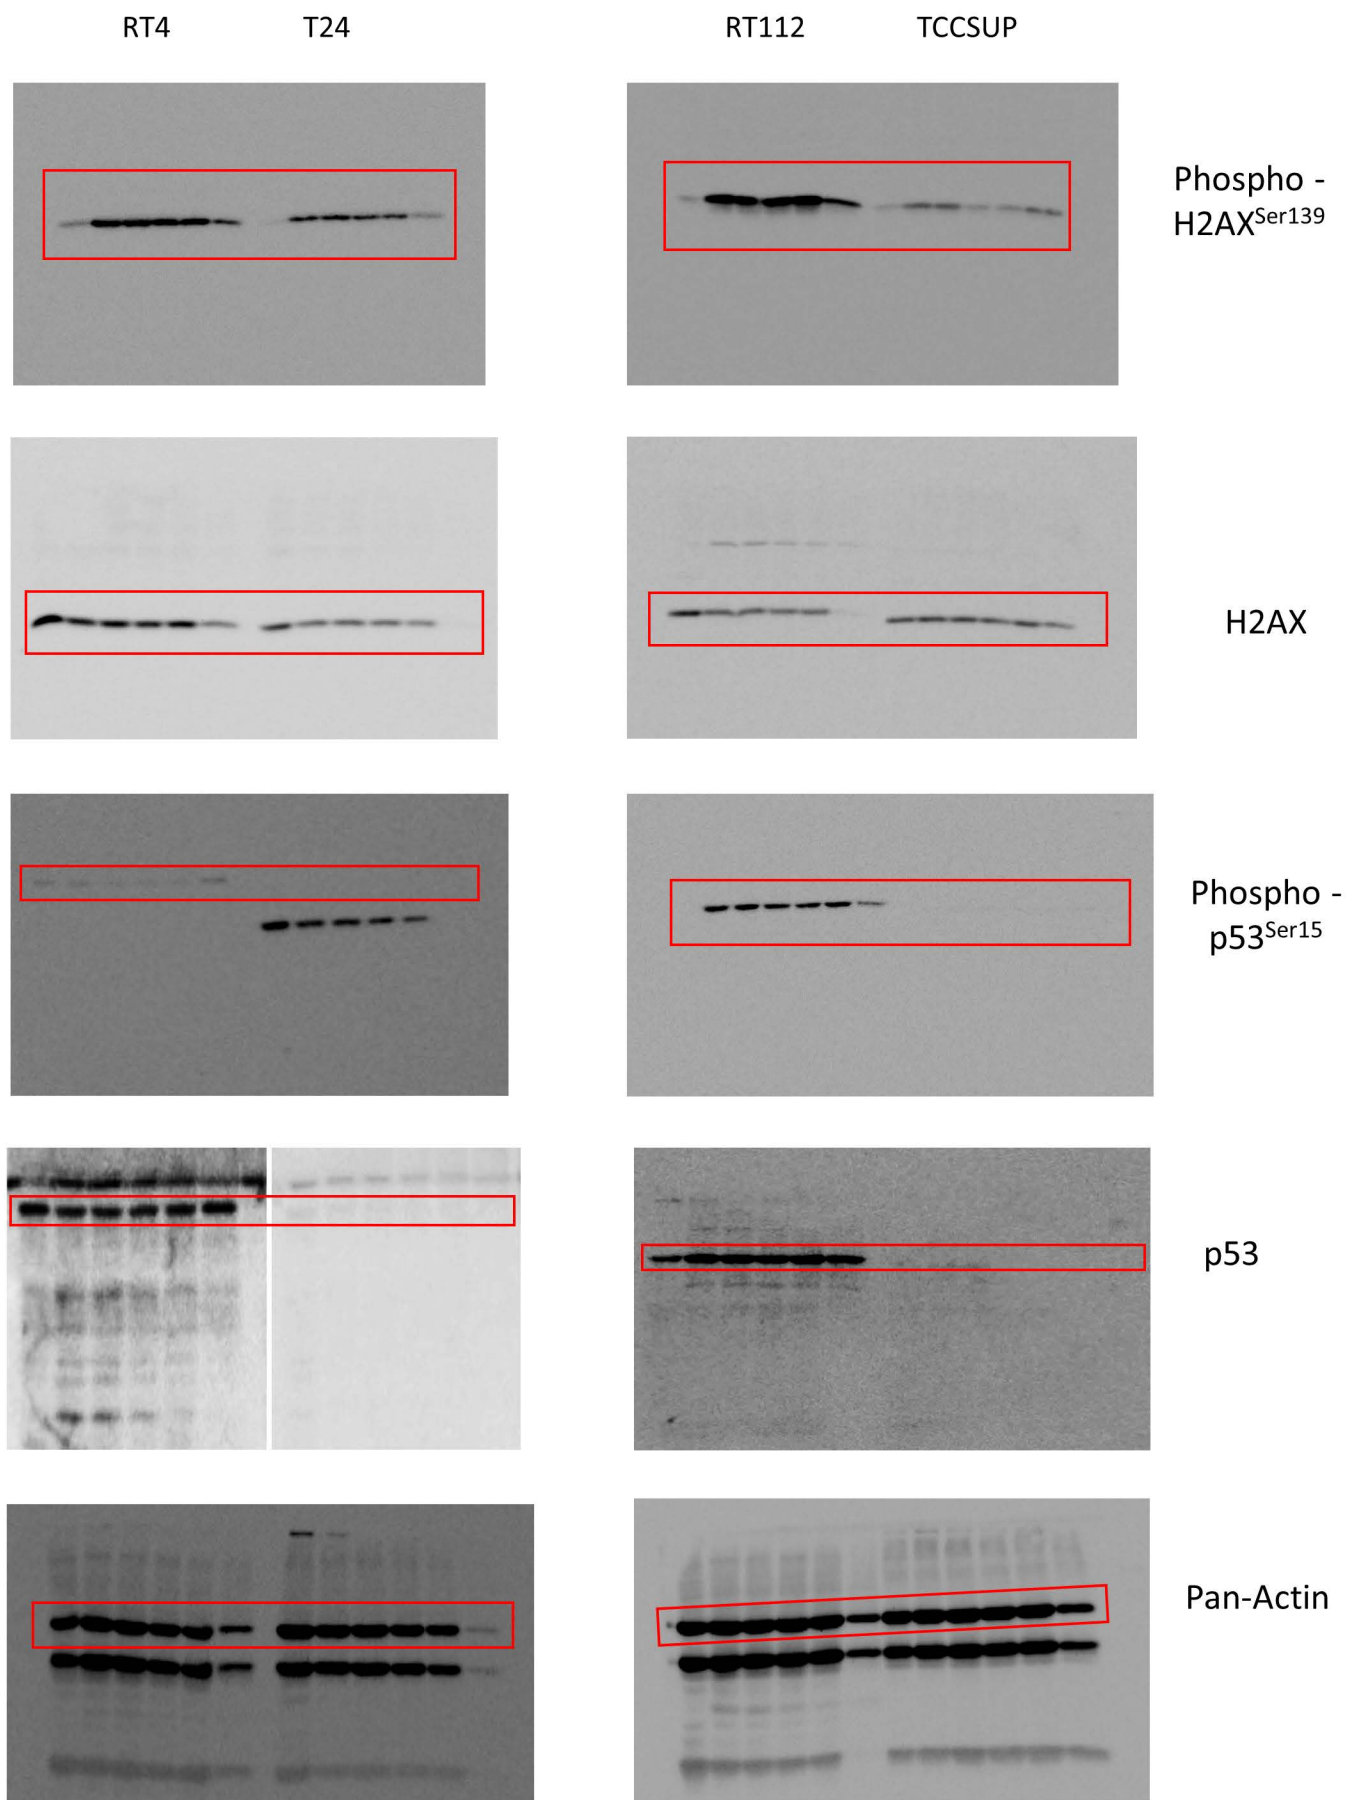

Figure 6A - original images of the Western Blots

Supplement: s1 [file s1]
